# Supplementary material for: Accurate Detection of Urothelial Bladder Cancer Using Targeted Deep Sequencing of Urine DNA
Source: Cancers (Basel). 2023 May 22;15(10):2868. doi: 10.3390/cancers15102868 (PMC10216686; doi:10.3390/cancers15102868)
Supplement: Supplementary file 1 [file cancers-15-02868-s001.zip › cancers-2342136-Supplementary Tables.xlsx]

## Sheet: S1
Table S1. Gene list of the AlphaLiquid100 capture panel
ABL1	BRCA1	CDK6	ESR1	IDH1	MAPK1	NF2	PIK3CA	RB1	STK11
AKT1	BRCA2	CDKN2A	FANCL	IDH2	MAPK3	NFE2L2	PIK3R1	RET	TCF7L2
AKT2	BRIP1	CEBPA	FBXW7	IGF1R	MDM2	NOTCH1	PMS2	RHEB	TERT
ALK	BTK	CHEK1	FGFR1	JAK2	MET	NPM1	PPP2R1A	RHOA	TOP2A
APC	CBL	CHEK2	FGFR2	JAK3	MLH1	NRAS	PPP2R2A	RIT1	TP53
AR	CCND1	CSF1R	FGFR3	KDM6A	MPL	NTRK1	PTEN	RNF43	TSC1
ARAF	CCND2	CTNNB1	FLT3	KDR	MSH2	NTRK2	PTPN11	ROS1	TSC2
ARID1A	CCNE1	DDR2	GATA3	KEAP1	MSH6	NTRK3	RAD51B	RUNX1	U2AF1
ATM	CD274	DPYD	GNA11	KIT	MTOR	PALB2	RAD51C	SETD2	UGT1A1
BARD1	CDH1	EGFR*	GNAQ	KRAS	MYC	PDCD1LG2	RAD51D	SMAD4	VHL
BCR	CDK12	ERBB2	GNAS	MAP2K1	MYCN	PDGFRA	RAD54L	SMO
BRAF	CDK4	ERBB3	HRAS	MAP2K2	NF1	PDGFRB	RAF1	STAG2

## Sheet: S2
Table S2. Sequencing depths of the samples for targeted regions
Patient	Sample type	Median depth
BC001	Tumor	9090
BC009	Tumor	7732
BC019	Tumor	8257
BC021	Tumor	7690
BC022	Tumor	4877
BC023	Tumor	7957
BC024	Tumor	7228
BC001	Urine	4693
BC002	Urine	3407
BC003	Urine	4609
BC004	Urine	7889
BC005	Urine	3243
BC006	Urine	5081
BC007	Urine	8850
BC009	Urine	2807
BC010	Urine	3267
BC011	Urine	6568
BC012	Urine	6644
BC013	Urine	6837
BC015	Urine	5818
BC016	Urine	7942
BC017	Urine	2943
BC019	Urine	6916
BC021	Urine	3724
BC022	Urine	4242
BC023	Urine	5947
BC024	Urine	4237
BC025	Urine	5776
BC026	Urine	3324
BC027	Urine	3897
BC028	Urine	3696
BC029	Urine	5402
BC030	Urine	6714
BC031	Urine	5124
BC033	Urine	7885
BC034	Urine	6162
BC035	Urine	6081
BC036	Urine	6951
BC037	Urine	7155
BC038	Urine	4474
BC039	Urine	3932
BC040	Urine	5268
BC041	Urine	7521
BC042	Urine	3387
BC043	Urine	5685
BC044	Urine	3191
BC045	Urine	6107
BC047	Urine	5186
BC048	Urine	4470
BC049	Urine	3262
HC003	Urine	6570
HC011	Urine	7091
HC024	Urine	6438
HC025	Urine	8990
HC031	Urine	4364
HC034	Urine	6630
HC036	Urine	7438
HC038	Urine	8662
HC039	Urine	8842
HC041	Urine	9143
HC045	Urine	10535
HC047	Urine	2925
HC056	Urine	10072
HC058	Urine	7508
HC063	Urine	9695
HC064	Urine	9240
HC065	Urine	9435
HC067	Urine	9144
HC070	Urine	6337
HC071	Urine	9207
HC076	Urine	5530

## Sheet: S3
Table S3. SNVs and INDELs in urine and tumor pairs
Patient	Mutation	Urine VAF	Tumor VAF
BC001	STAG2 p.S1075*	3.7	67.75
BC001	AKT2 p.E17K	2.97	38.85
BC001	KDM6A p.G1419*	2.88	68.01
BC001	FGFR3 p.S249C	2.42	38.2
BC001	CHEK2 p.T172Afs*4	2.36	34.91
BC001	RNF43 p.E772K	1.57	0
BC001	CDKN2A p.G156E	0	41.83
BC009	TP53 p.M237I	29.68	0
BC019	SETD2 p.R349G	56.96	17.34
BC019	HRAS p.Q61L	53.05	21.04
BC019	TERT c.-124C>T	41.24	23.23
BC019	TSC1 p.S35F	28.02	10.61
BC019	PIK3CA p.C378R	26.19	14.22
BC019	ERBB2 p.Q709L	22.51	8.95
BC019	STAG2 p.I179M	19.18	11.51
BC019	FGFR1 p.R68Q	19.02	8.12
BC019	CHEK2 p.R493Ifs*2	3.97	7.45
BC019	UGT1A1 p.F92Sfs*6	0	16.09
BC021	AKT1 p.E17K	3.87	44.71
BC021	STAG2 c.2359-2A>T	3.7	85.01
BC021	TERT c.-146C>T	3.29	48.7
BC022	KRAS p.G12V	17.18	45.26
BC022	CDH1 p.Q23*	15.76	45.47
BC022	KDM6A p.L599*	15.55	42.64
BC022	ATM p.S2376R	14.93	44
BC022	NF1 p.I429T	14.81	46.65
BC022	ERBB2 p.E265K	14.63	45.53
BC022	TERT c.-124C>T	14.59	55.99
BC022	STAG2 p.A488Vfs*6	13.62	40.62
BC022	PIK3CA p.K111_I112delinsN	11.54	36.72
BC022	TP53 p.S241F	2.24	0
BC022	FGFR3 p.G370C	2.06	0
BC022	PIK3CA p.E545K	1.91	0
BC022	RET p.E136*	1.88	0
BC022	ALK p.S47W	1.74	0
BC022	IGF1R p.G655R	0	45.98
BC022	PIK3CA p.E545G	0	6.05
BC023	TERT c.-124C>T	39.81	37.52
BC023	ARID1A p.Q512*	33.28	43.02
BC023	NF1 p.G127*	16.22	18.85
BC023	TP53 p.E56*	7.3	0
BC024	RB1 p.S634*	79.63	12.27
BC024	TP53 p.R280K	77.29	13.16
BC024	MSH2 p.S271F	65.85	16.82
BC024	PIK3CA p.E453K	53.96	10.54
BC024	PIK3CA p.D454N	53.96	10.54
BC024	FBXW7 p.S426L	47.17	12.11
BC024	TERT c.-124C>T	44.48	0
BC024	PTEN p.Q17*	40.48	8.87
BC024	ARID1A p.P109Lfs*5	28.65	7.49

## Sheet: S4
Table S4. SNVs and INDELs in urine samples detected by uAL100 without tumor samples
Patient	Gene	Mutation	Effect	VAF (%)	Data base
					COSMIC	OncoKB	Cancer Hospots
BC001	FGFR3	FGFR3 p.S249C	missense variant	2.42	oncogene, fusion	Oncogenic	-
BC001	STAG2	STAG2 p.S1075*	stop gained	3.7	TSG	Likely Oncogenic	-
BC001	AKT2	AKT2 p.E17K	missense variant&splice region variant	2.97	oncogene	Oncogenic	-
BC001	KDM6A	KDM6A p.G1419*	stop gained	2.88	-	Likely Oncogenic	-
BC001	CHEK2	CHEK2 p.T172Afs*4	frameshift variant	2.36	-	Likely Oncogenic	-
BC002	FGFR3	FGFR3 p.S249C	missense variant	25.12	oncogene, fusion	Oncogenic	-
BC002	FGFR3	FGFR3 p.K650E	missense variant	3.99	oncogene, fusion	Oncogenic	-
BC002	TERT	TERT c.-146C>T	upstream gene variant	43.08	-	-	-
BC003	TP53	TP53 p.Y126S	missense variant&splice region variant	14.97	oncogene, TSG, fusion	Likely Oncogenic	-
BC003	CTNNB1	CTNNB1 p.S37F	missense variant	6.76	oncogene, fusion	Likely Oncogenic	-
BC003	NTRK1	NTRK1 p.R649W	missense variant	11.02	oncogene, TSG, fusion	-	-
BC003	ARID1A	ARID1A p.D1850Gfs*4	frameshift variant	6.71	TSG, fusion	Likely Oncogenic	-
BC003	TERT	TERT c.-124C>T	upstream gene variant	16.02	-	-	-
BC004	HRAS	HRAS p.Q61L	missense variant	74.96	oncogene	Oncogenic	-
BC004	TERT	TERT c.-124C>T	upstream gene variant	48.58	-	-	-
BC005	CCND2	CCND2 p.A203T	missense variant	30.48	oncogene, fusion	-	-
BC006	TP53	TP53 p.E258Q	missense variant	69.88	oncogene, TSG, fusion	Likely Oncogenic	-
BC006	ERBB2	ERBB2 p.S310F	missense variant	69.02	oncogene, fusion	Oncogenic	-
BC006	SETD2	SETD2 p.S512*	stop gained	36.58	TSG	Likely Oncogenic	-
BC006	ARID1A	ARID1A p.S614*	stop gained	20.28	TSG, fusion	Likely Oncogenic	-
BC006	PIK3R1	PIK3R1 p.E507*	stop gained	18.35	TSG	Likely Oncogenic	-
BC006	TERT	TERT c.-146C>T	upstream gene variant	29.49	-	-	-
BC007	CDKN2A	CDKN2A p.S12*	stop gained	71.34	TSG	Likely Oncogenic	-
BC007	FGFR3	FGFR3 p.S249C	missense variant	22.89	oncogene, fusion	Oncogenic	-
BC007	ERBB2	ERBB2 p.R103Q	missense variant	21.59	oncogene, fusion	Likely Oncogenic	-
BC007	FGFR3	FGFR3 p.R248C	missense variant&splice region variant	8.57	oncogene, fusion	Oncogenic	-
BC007	TP53	TP53 p.R267P	missense variant	4.77	oncogene, TSG, fusion	Likely Oncogenic	-
BC007	KDM6A	KDM6A p.Q346*	stop gained	86.5	oncogene, TSG	Likely Oncogenic	-
BC007	STAG2	STAG2 p.Q573*	stop gained	85.97	TSG	Likely Oncogenic	-
BC007	FBXW7	FBXW7 p.Q306*	stop gained	39.99	TSG	Likely Oncogenic	-
BC007	GNAS	GNAS p.S51F	missense variant	39.76	oncogene	-	-
BC007	TCF7L2	TCF7L2 p.E33K	missense variant	29.47	oncogene, fusion	-	-
BC007	PTEN	PTEN p.Y315Mfs*21	frameshift variant	2.25	-	Likely Oncogenic	-
BC007	PTEN	PTEN p.S302Yfs*6	frameshift variant	1.8	-	Likely Oncogenic	-
BC007	TERT	TERT c.-146C>T	upstream gene variant	50.28	-	-	-
BC009	TP53	TP53 p.M237I	missense variant	29.68	oncogene, TSG, fusion	Likely Oncogenic	-
BC010	TP53	TP53 p.R213*	stop gained	9.3	oncogene, TSG, fusion	Likely Oncogenic	-
BC010	KEAP1	KEAP1 p.R470C	missense variant	5.87	TSG	Oncogenic	-
BC010	ARID1A	ARID1A p.K250Rfs*152	frameshift variant	5.16	TSG, fusion	Likely Oncogenic	-
BC010	TSC1	TSC1 p.Q516*	stop gained	4.93	TSG	Likely Oncogenic	-
BC010	GNAS	GNAS p.Q195*	stop gained&splice region variant	4.83	oncogene	-	-
BC010	TERT	TERT c.-124C>T	upstream gene variant	10.59	-	-	-
BC011	ERBB3	ERBB3 p.V104L	missense variant	39.89	oncogene	Likely Oncogenic	-
BC011	FBXW7	FBXW7 p.S546L	missense variant	38.94	TSG	Likely Oncogenic	-
BC011	ARID1A	ARID1A p.Q425*	stop gained	39.66	TSG, fusion	Likely Oncogenic	-
BC011	ARID1A	ARID1A p.Q501*	stop gained	20.93	TSG, fusion	Likely Oncogenic	-
BC011	BARD1	BARD1 p.Q177*	stop gained	4.18	-	Likely Oncogenic	-
BC011	TERT	TERT c.-124C>T	upstream gene variant	28.57	-	-	-
BC012	PIK3CA	PIK3CA p.E545K	missense variant	17.64	oncogene	Oncogenic	-
BC012	CTNNB1	CTNNB1 p.S37C	missense variant	17.04	oncogene, fusion	Likely Oncogenic	-
BC012	KRAS	KRAS p.G12D	missense variant	3.14	oncogene	Oncogenic	-
BC012	NOTCH1	NOTCH1 p.W1062*	stop gained	26.96	-	Oncogenic	-
BC012	CBL	CBL p.R499Q	missense variant	24.45	oncogene, TSG, fusion	-	-
BC012	ARID1A	ARID1A p.Q515*	stop gained	22.26	TSG, fusion	Likely Oncogenic	-
BC012	MET	MET p.S186L	missense variant	19.82	oncogene	-	-
BC012	FANCL	FANCL p.Q328*	stop gained	18.48	-	Likely Oncogenic	-
BC012	ERBB3	ERBB3 p.D951H	missense variant	16.74	oncogene	-	-
BC012	PDGFRB	PDGFRB p.E490K	missense variant	15.37	oncogene, fusion	-	-
BC012	ERBB3	ERBB3 p.S1234F	missense variant	3.33	oncogene	-	-
BC013	TP53	TP53 p.Y205C	missense variant	73.23	oncogene, TSG, fusion	Likely Oncogenic	-
BC013	CDKN2A	CDKN2A p.D74N	missense variant	70.97	TSG	Oncogenic	-
BC013	TSC1	TSC1 p.Q763*	stop gained	67.97	TSG	Likely Oncogenic	-
BC013	ESR1	ESR1 p.T585M	missense variant	25.07	oncogene, TSG, fusion	-	-
BC013	ARID1A	ARID1A p.S334*	stop gained	15.19	TSG, fusion	Likely Oncogenic	-
BC013	TSC1	TSC1 p.Q55*	stop gained	5.83	TSG	Likely Oncogenic	-
BC013	FBXW7	FBXW7 p.W673*	stop gained	5.03	TSG	Likely Oncogenic	-
BC013	PIK3CA	PIK3CA p.L339V	missense variant	3.41	oncogene	-	-
BC013	TERT	TERT c.-124C>T	upstream gene variant	50	-	-	-
BC013	CDKN2A	CDKN2A c.458-1G>C	splice acceptor variant	70.29	-	-	headandneck:10, esophagusstomach:3, skin:2, lung:1
BC015	TP53	TP53 p.D259H	missense variant	65.09	oncogene, TSG, fusion	Likely Oncogenic	-
BC015	TP53	TP53 p.C242Y	missense variant	63.28	oncogene, TSG, fusion	Likely Oncogenic	-
BC015	CDKN2A	CDKN2A p.S12L	missense variant	1.57	TSG	Likely Oncogenic	-
BC016	TP53	TP53 p.E285*	stop gained	3.49	oncogene, TSG, fusion	Likely Oncogenic	-
BC016	ARID1A	ARID1A p.Q268*	stop gained	3.2	TSG, fusion	Likely Oncogenic	-
BC016	TERT	TERT c.-146C>T	upstream gene variant	1.98	-	-	-
BC017	KRAS	KRAS p.G12D	missense variant	2.83	oncogene	Oncogenic	-
BC019	PIK3CA	PIK3CA p.C378R	missense variant	26.19	oncogene	Likely Oncogenic	-
BC019	TSC1	TSC1 p.S35F	missense variant&splice region variant	28.02	-	Likely Oncogenic	-
BC019	ERBB2	ERBB2 p.Q709L	missense variant	22.51	oncogene, fusion	Oncogenic	-
BC019	CHEK2	CHEK2 p.R493Ifs*2	stop gained&frameshift variant	3.97	-	Likely Oncogenic	-
BC019	TERT	TERT c.-124C>T	upstream gene variant	41.24	-	-	-
BC021	AKT1	AKT1 p.E17K	missense variant&splice region variant	3.87	oncogene	Oncogenic	-
BC021	TERT	TERT c.-146C>T	upstream gene variant	3.29	-	-	-
BC022	KRAS	KRAS p.G12V	missense variant	17.18	oncogene	Oncogenic	-
BC022	CDH1	CDH1 p.Q23*	stop gained	15.76	TSG	Likely Oncogenic	-
BC022	TP53	TP53 p.S241F	missense variant	2.24	oncogene, TSG, fusion	Likely Oncogenic	-
BC022	FGFR3	FGFR3 p.G370C	missense variant	2.06	oncogene, fusion	Likely Oncogenic	-
BC022	PIK3CA	PIK3CA p.E545K	missense variant	1.91	oncogene	Oncogenic	-
BC022	KDM6A	KDM6A p.L599*	frameshift variant	15.55	-	Likely Oncogenic	-
BC022	ERBB2	ERBB2 p.E265K	missense variant	14.63	oncogene, fusion	Likely Oncogenic	-
BC022	STAG2	STAG2 p.A488Vfs*6	frameshift variant	13.62	-	Likely Oncogenic	-
BC022	PIK3CA	PIK3CA p.K111_I112delinsN	inframe deletion	11.54	oncogene	-	-
BC022	TERT	TERT c.-124C>T	upstream gene variant	14.59	-	-	-
BC023	ARID1A	ARID1A p.Q512*	stop gained	33.28	TSG, fusion	Likely Oncogenic	-
BC023	NF1	NF1 p.G127*	stop gained	16.22	-	Likely Oncogenic	-
BC023	TP53	TP53 p.E56*	stop gained	7.3	oncogene, TSG, fusion	Likely Oncogenic	-
BC023	TERT	TERT c.-124C>T	upstream gene variant	39.81	-	-	-
BC024	TP53	TP53 p.R280K	missense variant	77.29	oncogene, TSG, fusion	Oncogenic	-
BC024	RB1	RB1 p.S634*	stop gained	79.63	TSG	Likely Oncogenic	-
BC024	ARID1A	ARID1A p.P109Lfs*5	frameshift variant	28.65	-	Likely Oncogenic	-
BC024	TERT	TERT c.-124C>T	upstream gene variant	44.48	-	-	-
BC025	TP53	TP53 p.H179R	missense variant	80.8	oncogene, TSG, fusion	Likely Oncogenic	-
BC025	PIK3CA	PIK3CA p.H1047L	missense variant	33.82	oncogene	Oncogenic	-
BC025	TERT	TERT c.-146C>T	upstream gene variant	34.9	-	-	-
BC026	TP53	TP53 c.560-2A>T	splice acceptor variant	18.78	-	-	lung:20, breast:14, esophagusstomach:11, ovaryfallopiantube:11, bowel:7, headandneck:7, skin:7, pancreas:6, softtissue:5, cnsbrain:4, bladder:2, uterus:2, blood:1, kidney:1, liver:1, prostate:1
BC027	PIK3CA	PIK3CA p.H1047R	missense variant	3.83	oncogene	Oncogenic	-
BC027	FGFR3	FGFR3 p.R248C	missense variant&splice region variant	2.67	oncogene, fusion	Oncogenic	-
BC027	TERT	TERT c.-146C>T	upstream gene variant	1.95	-	-	-
BC028	ERBB3	ERBB3 p.V104L	missense variant	1.67	oncogene	Likely Oncogenic	-
BC028	TP53	TP53 p.P36Afs*7	frameshift variant	77.79	oncogene, TSG, fusion	Likely Oncogenic	-
BC028	NF1	NF1 p.K584*	stop gained	12.64	-	Likely Oncogenic	-
BC028	TERT	TERT c.-124C>T	upstream gene variant	36.79	-	-	-
BC031	TP53	TP53 p.R280T	missense variant	82.6	oncogene, TSG, fusion	Likely Oncogenic	-
BC031	PIK3CA	PIK3CA p.E545K	missense variant	71.42	oncogene	Oncogenic	-
BC031	MSH2	MSH2 p.Q462*	stop gained&splice region variant	8.96	TSG	Likely Oncogenic	-
BC031	BRCA1	BRCA1 p.S864*	stop gained	5.59	TSG	Likely Oncogenic	-
BC031	TERT	TERT c.-124C>T	upstream gene variant	31.93	-	-	-
BC033	ATM	ATM p.R1898Sfs*20	frameshift variant	15.89	-	Likely Oncogenic	-
BC033	TERT	TERT c.-124C>T	upstream gene variant	58.6	-	-	-
BC036	FGFR3	FGFR3 p.S249C	missense variant	37.11	oncogene, fusion	Oncogenic	-
BC036	TSC1	TSC1 p.P430Hfs*10	frameshift variant	20.43	-	Likely Oncogenic	-
BC036	TERT	TERT c.-124C>T	upstream gene variant	26.35	-	-	-
BC037	TP53	TP53 p.R213*	stop gained	12.72	oncogene, TSG, fusion	Likely Oncogenic	-
BC037	NTRK3	NTRK3 p.E355K	missense variant	8.05	oncogene, fusion	-	-
BC037	KDM6A	KDM6A p.S634*	stop gained	7.29	oncogene, TSG	Likely Oncogenic	-
BC037	TP53	TP53 p.E204Sfs*43	frameshift variant	7.01	oncogene, TSG, fusion	Likely Oncogenic	-
BC038	KDM6A	KDM6A p.Q1055*	stop gained	19.42	oncogene, TSG	Likely Oncogenic	-
BC038	ERBB2	ERBB2 p.S310Y	missense variant	14.9	oncogene, fusion	Oncogenic	-
BC038	ERBB3	ERBB3 p.E928K	missense variant	13.86	oncogene	Likely Oncogenic	-
BC038	TP53	TP53 p.E285K	missense variant	12	oncogene, TSG, fusion	Likely Oncogenic	-
BC038	PIK3CA	PIK3CA p.E39K	missense variant	10.36	oncogene	Likely Oncogenic	-
BC038	ERBB2	ERBB2 p.S310F	missense variant	2.07	oncogene, fusion	Oncogenic	-
BC038	ARID1A	ARID1A p.S1149*	stop gained	16.74	-	Likely Oncogenic	-
BC038	CCND2	CCND2 p.E65Q	missense variant&splice region variant	8.5	oncogene, fusion	-	-
BC038	MYCN	MYCN p.G151E	missense variant	5.73	oncogene	-	-
BC038	IDH2	IDH2 p.S326F	missense variant	4.23	oncogene	-	-
BC038	RUNX1	RUNX1 p.G165S	missense variant	3.13	oncogene, TSG, fusion	-	-
BC038	TSC1	TSC1 p.Q328*	stop gained	2.94	TSG	Likely Oncogenic	-
BC038	TERT	TERT c.-146C>T	upstream gene variant	20.6	-	-	-
BC038	TP53	TP53 c.994-1G>C	splice acceptor variant	6.18	-	-	lung:8, breast:6, headandneck:5, bladder:4, cnsbrain:4, uterus:4, bowel:3, liver:3, ovaryfallopiantube:3, esophagusstomach:2, skin:2, biliarytract:1, lymph:1, prostate:1, softtissue:1
BC039	AKT2	AKT2 p.L155F	missense variant	38.41	oncogene	-	-
BC040	HRAS	HRAS p.G13R	missense variant	19.17	oncogene	Likely Oncogenic	-
BC040	BRAF	BRAF p.S467L	missense variant	17.01	oncogene, fusion	Oncogenic	-
BC040	TERT	TERT c.-124C>T	upstream gene variant	20.21	-	-	-
BC042	HRAS	HRAS p.Q61L	missense variant	33.3	oncogene	Oncogenic	-
BC042	RB1	RB1 p.R320*	stop gained	21.5	TSG	Likely Oncogenic	-
BC042	PIK3CA	PIK3CA p.H1047R	missense variant	20.26	oncogene	Oncogenic	-
BC042	ERBB3	ERBB3 p.E332K	missense variant	20.22	oncogene	Likely Oncogenic	-
BC042	ARID1A	ARID1A p.Q611*	stop gained	21.04	TSG, fusion	Likely Oncogenic	-
BC042	RB1	RB1 p.S567L	missense variant	16.73	TSG	Likely Oncogenic	-
BC042	TERT	TERT c.-124C>T	upstream gene variant	26.48	-	-	-
BC043	PIK3CA	PIK3CA p.C420R	missense variant	33.04	oncogene	Oncogenic	-
BC044	TP53	TP53 p.Q331*	stop gained&splice region variant	22.48	oncogene, TSG, fusion	Likely Oncogenic	-
BC044	ERBB2	ERBB2 p.V777L	missense variant	5.41	oncogene, fusion	Oncogenic	-
BC044	ERBB2	ERBB2 p.T733I	missense variant	2.91	oncogene, fusion	Likely Oncogenic	-
BC044	BRAF	BRAF p.S126F	missense variant	10.97	oncogene, fusion	-	-
BC044	KEAP1	KEAP1 p.Q75*	stop gained	10.78	TSG	Likely Oncogenic	-
BC044	ARID1A	ARID1A p.Q515*	stop gained	7.25	TSG, fusion	Likely Oncogenic	-
BC044	ERBB3	ERBB3 p.G325E	missense variant	5.72	oncogene	-	-
BC044	ALK	ALK p.A29T	missense variant	5.38	oncogene, fusion	-	-
BC044	KDM6A	KDM6A p.K70Nfs*12	frameshift variant	4.17	-	Likely Oncogenic	-
BC044	FBXW7	FBXW7 p.R479Gfs*14	frameshift variant	3.38	-	Likely Oncogenic	-
BC044	TERT	TERT c.-124C>T	upstream gene variant	10.46	-	-	-
BC047	TP53	TP53 p.E180K	missense variant	90.25	oncogene, TSG, fusion	Likely Oncogenic	-
BC047	TERT	TERT c.-124C>T	upstream gene variant	72.61	-	-	-
BC047	RB1	RB1 c.1215+1G>A	splice donor variant	24.55	-	-	bladder:6, lung:5, cnsbrain:3, prostate:2, ovaryfallopiantube:1, softtissue:1, uterus:1
BC049	PIK3CA	PIK3CA p.E81K	missense variant	16.88	oncogene	-	-
BC049	ERBB2	ERBB2 p.R536W	missense variant	28.62	oncogene, fusion	-	-
BC049	RHOA	RHOA p.K18N	missense variant	18.22	oncogene, TSG	-	-
BC049	TERT	TERT c.-124C>T	upstream gene variant	59.79	-	-	-

## Sheet: S5
Table S5. SNVs and INDELs of urine samples within the germline VAF ranges
Patient	Gene	Mutation	Effect	VAF (%)	Data base
					COSMIC	OncoKB	Cancer Hospots
BC004	ALK	ALK p.R136W	missense variant	47.87	oncogene, fusion	-	-
BC007	ERBB2	ERBB2 p.V777L	missense variant	46.49	oncogene, fusion	Oncogenic	-
BC007	BRAF	BRAF p.K483E	missense variant	42.12	oncogene, fusion	Likely Oncogenic	-
BC013	TCF7L2	TCF7L2 p.S138F	missense variant	52.17	oncogene, fusion	-	-
BC013	RUNX1	RUNX1 p.E143*	stop gained	42.17	-	Likely Oncogenic	-
BC015	KDM6A	KDM6A p.S323*	stop gained	54.86	-	Likely Oncogenic	-
BC019	HRAS	HRAS p.Q61L	missense variant	53.05	oncogene	Oncogenic	-
BC023	FGFR3	FGFR3 p.S249C	missense variant	47.5	oncogene, fusion	Oncogenic	-
BC024	PIK3CA	PIK3CA p.E453K	missense variant	53.96	oncogene	Oncogenic	-
BC024	PIK3CA	PIK3CA p.D454N	missense variant	53.96	oncogene	-	-
BC024	NTRK3	NTRK3 p.R326C	missense variant	45.7	oncogene, fusion	-	-
BC024	PTEN	PTEN p.Q17*	stop gained	40.48	TSG	Likely Oncogenic	-
BC025	RB1	RB1 p.R579*	stop gained	51.17	TSG	Likely Oncogenic	-
BC031	ARID1A	ARID1A p.S303Gfs*95	frameshift variant	51.7	-	Likely Oncogenic	-
BC037	PDGFRB	PDGFRB p.T347A	missense variant	47.75	oncogene, fusion	-	-
BC039	TP53	TP53 c.673-2A>C	splice acceptor variant	56.84	-	-	lung:10, breast:7, headandneck:5, cnsbrain:3, esophagusstomach:3, kidney:3, ovaryfallopiantube:3, skin:3, uterus:3, bowel:2, blood:1, liver:1, prostate:1, unk:1
BC040	MET	MET p.L317F	missense variant	49.91	oncogene	-	-
BC040	PDGFRA	PDGFRA p.R479Q	missense variant	48.63	oncogene, fusion	-	-
BC042	KIT	KIT p.R956W	missense variant	48.96	oncogene	-	-
BC047	ABL1	ABL1 p.E675K	missense variant	57.07	oncogene, fusion	-	-
BC049	FBXW7	FBXW7 p.R505C	missense variant	55.38	TSG	Oncogenic	-
HC031	NTRK1	NTRK1 p.N318S	missense variant	48.66	oncogene, TSG, fusion	-	-
HC038	ABL1	ABL1 p.S977N	missense variant	46.7	oncogene, fusion	-	-
HC038	ALK	ALK p.R1192G	missense variant	44.62	-	Likely Oncogenic	-
HC058	KDM6A	KDM6A p.R1403Q	missense variant	100	oncogene, TSG	-	-
HC058	NTRK1	NTRK1 p.R583C	missense variant	46.4	oncogene, TSG, fusion	-	-
